# Supplementary material for: A Double-Blind, Randomized, Placebo-Controlled Trial to Evaluate the Efficacy of a Hydrolyzed Chicken Collagen Type II Supplement in Alleviating Joint Discomfort
Source: MDPI journal article supplement (doi:10.3390/nu13072454), 2021-07-18
Supplement: s1 [file s1]

**A double-blind, randomized, placebo-controlled trial to  
evaluate the efficacy of a hydrolyzed chicken collagen type II  
supplement in alleviating joint discomfort**

Mohammed A. and He S.

**Supplementary Materials**

**Table S1.** WOMAC sub-score change at week 8 in the stiffness domain, stratified by the severity of stiffness at baseline.

| Baseline stiffness <sup>1,2</sup> | $\beta$ Coefficient <sup>3</sup> | (90% CI)      | (95% CI)      | p-value <sup>4</sup> |
|-----------------------------------|----------------------------------|---------------|---------------|----------------------|
| Pooled (n = 89)                   | -26.9                            | (-47.3, -6.5) | (-51.0, -2.9) | 0.031                |
| Severe (n = 26)                   | -5.7                             | (-32.3, 20.9) | (-36.1, 24.8) | 0.718                |
| Non-severe (n = 63)               | -34.9                            | (-61.4, -8.4) | (-66.0, -3.8) | 0.032                |

<sup>1</sup> Baseline stiffness dichotomization: within the stiffness domain, if the participant answered severe (3) or extreme (4) to any of the questions were considered having “severe” stiffness at baseline, otherwise non-severe

<sup>2</sup> For this set of analysis, no outlier was removed

<sup>3</sup>  $\beta$  Coefficient and confidence intervals obtained from least squares regression analysis; the values were AVC-H2 group minus placebo group.

<sup>4</sup> P-value was based on *F*-test in linear regression models. Two-tailed p-value *a priori* set at 0.05

Abbreviations: AVC-H2, Avicenna’s Hydrolyzed Chicken Collagen Type II; CI, confidence interval; WOMAC, The Western Ontario and McMaster Universities Arthritis Index survey

**Table S2.** WOMAC overall score from baseline to follow-up weeks, after removing non-compliant participants.

| Time point | Measurement <sup>1</sup> | Placebo <sup>2</sup><br>(mean ± SD) | AVC-H2 <sup>2</sup><br>(mean ± SD) | β Coefficient <sup>3</sup><br>(95% CI) | p-value <sup>4</sup> |
|------------|--------------------------|-------------------------------------|------------------------------------|----------------------------------------|----------------------|
| Baseline   | Raw score                | 30.1 ± 17.7                         | 29.6 ± 16.2                        | ---                                    | 0.889                |
| Week 4     | Raw score                | 25.2 ± 19.8                         | 19.7 ± 15.3                        | ---                                    | 0.185                |
|            | %Δ                       | -16.2 ± 51.3                        | -38.0 ± 38.1                       | -21.8 (-41.9, -1.7)                    | 0.045                |
| Week 8     | Score                    | 20.4 ± 19.5                         | 16.3 ± 15.1                        | ---                                    | 0.318                |
|            | %Δ                       | -33.2 ± 46.5                        | -48.0 ± 41.7                       | -14.8 (-34.7, 5.1)                     | 0.155                |

<sup>1</sup> Raw score obtained from the WOMAC questionnaire; %Δ calculated as the difference between baseline and follow-up score, divided by baseline score, and presented in percentage format.

<sup>2</sup> Two participants removed from this set of analysis, 1 in each group, both due to implausible %Δ value.

<sup>3</sup> β Coefficient and confidence intervals obtained from least squares regression analysis; the values were HC group minus placebo group.

<sup>4</sup> P-value was based on one of the following methods, where appropriate: Student's *t*-test for continuous variables with normal distribution; Mann Whitney *U* test for continuous variables with non-normal distribution. Two-tailed p-value *a priori* set at 0.05

Abbreviations: AVC-H2, Avicenna's Hydrolyzed Chicken Collagen Type II; CI, confidence interval; SD, standard deviation; WOMAC, The Western Ontario and McMaster Universities Arthritis Index survey

**Table S3.** WOMAC sub-score in the pain domain from baseline to follow-up weeks, after removing non-compliant participants.

| Time point | Measurement <sup>1</sup> | Placebo <sup>2</sup><br>(mean ± SD) | AVC-H2 <sup>2</sup><br>(mean ± SD) | β Coefficient <sup>3</sup><br>(95% CI) | p-value <sup>4</sup> |
|------------|--------------------------|-------------------------------------|------------------------------------|----------------------------------------|----------------------|
| Baseline   | Raw score                | 6.8 ± 3.9                           | 6.1 ± 3.6                          | ---                                    | 0.422                |
| Week 4     | Raw score                | 5.1 ± 4.1                           | 4.2 ± 3.4                          | ---                                    | 0.301                |
|            | %Δ                       | -13.9 ± 60.4                        | -31.8 ± 57.7                       | -12.5 (-39.2, 14.2)                    | 0.366                |
| Week 8     | Score                    | 4.4 ± 4.3                           | 3.3 ± 3.3                          | ---                                    | 0.258                |
|            | %Δ                       | -33.1 ± 54.7                        | -45.9 ± 48.4                       | -12.8 (-36.1, 10.4)                    | 0.291                |

<sup>1</sup> Raw score obtained from the WOMAC questionnaire; %Δ calculated as the difference between baseline and follow-up score, divided by baseline score, and presented in percentage format.

<sup>2</sup> Two participants removed from this set of analysis, 1 in each group, both due to incalculable %Δ (baseline score was 0 in this domain)

<sup>3</sup> β Coefficient and confidence intervals obtained from least squares regression analysis; the values were collagen group minus placebo group.

<sup>4</sup> P-value was based on one of the following methods, where appropriate: Student's *t*-test for continuous variables with normal distribution; Mann Whitney U test for continuous variables with non-normal distribution. Two-tailed p-value *a priori* set at 0.05

Abbreviations: AVC-H2, Avicenna's Hydrolyzed Chicken Collagen Type II; CI, confidence interval; SD, standard deviation; WOMAC, The Western Ontario and McMaster Universities Arthritis Index survey

**Table S4.** WOMAC sub-score in the stiffness domain from baseline to follow-up weeks, after removing non-compliant participants.

| Time point | Measurement <sup>1</sup> | Placebo <sup>2</sup><br>(mean ± SD) | AVC-H2 <sup>2</sup><br>(mean ± SD) | β Coefficient <sup>3</sup><br>(95% CI) | p-value <sup>4</sup> |
|------------|--------------------------|-------------------------------------|------------------------------------|----------------------------------------|----------------------|
| Baseline   | Raw score                | 4.3 ± 2.0                           | 4.8 ± 1.8                          | ---                                    | 0.262                |
| Week 4     | Raw score                | 3.8 ± 2.4                           | 3.1 ± 2.1                          | ---                                    | 0.200                |
|            | %Δ                       | -9.6 ± 52.5                         | -36.9 ± 42.4                       | -27.3 (-48.6, -6.0)                    | 0.018                |
| Week 8     | Score                    | 3.2 ± 2.4                           | 2.6 ± 2.1                          | ---                                    | 0.293                |
|            | %Δ                       | -21.3 ± 52.9                        | -44.4 ± 44.5                       | -23.1 (-45.0, -1.1)                    | 0.048                |

<sup>1</sup> Raw score obtained from the WOMAC questionnaire; %Δ calculated as the difference between baseline and follow-up score, divided by baseline score, and presented in percentage format.

<sup>2</sup> One participant removed from this set of analysis in HC group, due to incalculable %Δ (baseline score was 0 in this domain).

<sup>3</sup> β Coefficient and confidence intervals obtained from least squares regression analysis; the values were HC group minus placebo group.

<sup>4</sup> P-value was based on one of the following methods, where appropriate: Student's *t*-test for continuous variables with normal distribution; Mann Whitney U test for continuous variables with non-normal distribution. Two-tailed p-value *a priori* set at 0.05

Abbreviations: AVC-H2, Avicenna's Hydrolyzed Chicken Collagen Type II; CI, confidence interval; SD, standard deviation; WOMAC, The Western Ontario and McMaster Universities Arthritis Index survey

**Table S5.** WOMAC sub-score in the difficulty in physical activities domain from baseline to follow-up weeks, after removing non-compliant participants.

| Time point | Measurement <sup>1</sup> | Placebo <sup>2</sup><br>(mean ± SD) | AVC-H2 <sup>2</sup><br>(mean ± SD) | β Coefficient <sup>3</sup><br>(95% CI) | p-value <sup>4</sup> |
|------------|--------------------------|-------------------------------------|------------------------------------|----------------------------------------|----------------------|
| Baseline   | Raw score                | 19.0 ± 12.8                         | 18.7 ± 11.7                        | ---                                    | 0.903                |
| Week 4     | Raw score                | 16.3 ± 14.2                         | 12.4 ± 10.8                        | ---                                    | 0.184                |
|            | %Δ                       | -14.1 ± 60.1                        | -41.2 ± 37.7                       | -27.1 (-49.3, -4.9)                    | 0.029                |
| Week 8     | Score                    | 12.9 ± 13.7                         | 10.3 ± 10.5                        | ---                                    | 0.378                |
|            | %Δ                       | -33.8 ± 49.5                        | -48.2 ± 48.3                       | -14.5 (-36.8, 7.9)                     | 0.211                |

<sup>1</sup> Raw score obtained from the WOMAC questionnaire; %Δ calculated as the difference between baseline and follow-up score, divided by baseline score, and presented in percentage format.

<sup>2</sup> Three participants removed from this set of analysis, 1 in the HC group and 2 in the placebo group, due to implausible %Δ value and incalculable %Δ (baseline score was 0 in this domain).

<sup>3</sup> β Coefficient and confidence intervals obtained from least squares regression analysis; the values were HC group minus placebo group.

<sup>4</sup> P-value was based on one of the following methods, where appropriate: Student's *t*-test for continuous variables with normal distribution; Mann Whitney U test for continuous variables with non-normal distribution. Two-tailed p-value *a priori* set at 0.05

Abbreviations: AVC-H2, Avicenna's Hydrolyzed Chicken Collagen Type II; CI, confidence interval; SD, standard deviation; WOMAC, The Western Ontario and McMaster Universities Arthritis Index survey

**Table S6.** VAS pain assessment scale from baseline to follow-up weeks, after removing non-compliant participants.

| Time point | Measurement <sup>1</sup> | Placebo <sup>2</sup> | AVC-H2 <sup>2</sup> | $\beta$ Coefficient <sup>3</sup> | p-value <sup>4</sup> |
|------------|--------------------------|----------------------|---------------------|----------------------------------|----------------------|
|            |                          | (mean $\pm$ SD)      | (mean $\pm$ SD)     | (95% CI)                         |                      |
| Baseline   | Raw score                | 5.2 $\pm$ 1.4        | 5.3 $\pm$ 1.3       | ---                              | 0.712                |
| Week 4     | Raw score                | 3.7 $\pm$ 2.2        | 2.8 $\pm$ 1.8       | ---                              | 0.070                |
|            | % $\Delta$               | -30.6 $\pm$ 32.2     | -43.9 $\pm$ 35.3    | -13.3 (-28.6, 2.1) <sup>5</sup>  | 0.090                |
| Week 8     | Score                    | 3.2 $\pm$ 2.3        | 2.2 $\pm$ 1.9       | ---                              | 0.062                |
|            | % $\Delta$               | -39.8 $\pm$ 33.7     | -54.6 $\pm$ 37.0    | -14.8 (-30.9, 1.3) <sup>6</sup>  | 0.071                |

<sup>1</sup> Raw score obtained from the VAS scale; % $\Delta$  calculated as the difference between baseline and follow-up score, divided by baseline score, and presented in percentage format.

<sup>2</sup> One participant removed from this set of analysis in the HC group, due to implausible % $\Delta$  value.

<sup>3</sup>  $\beta$  Coefficient and confidence intervals obtained from least squares regression analysis; the values were HC group minus placebo group.

<sup>4</sup> P-value was based on one of the following methods, where appropriate: Student's *t*-test for continuous variables with normal distribution; Mann Whitney U test for continuous variables with non-normal distribution. Two-tailed p-value *a priori* set at 0.05

<sup>5</sup> Significant at 90%CI level (-26.3, -0.2).

<sup>6</sup> Significant at 90%CI level (-28.4, -1.1).

Abbreviations: AVC-H2, Avicenna's Hydrolyzed Chicken Collagen Type II; CI, confidence interval; SD, standard deviation; VAS, Visual Analogue Scale.
